# Supplementary material for: Evidence of surgical outcomes fluctuates over time: results from a cumulative meta-analysis of laparoscopic versus open appendectomy for acute appendicitis
Source: Springer Nature journal article supplement (doi:10.1186/s12876-016-0453-0), 2016-03-15

| Study name     | Cumulative statistics |             |             |         | Cumulative Events / Total |                           | Cumulative mh odds ratio (95% CI) |
|----------------|-----------------------|-------------|-------------|---------|---------------------------|---------------------------|-----------------------------------|
|                | Point                 | Lower limit | Upper limit | Z-Value | p-Value                   | Laparoscopic Appendectomy | Open Appendectomy                 |
| Eichen 1994    | 0.33                  | 0.01        | 8.22        | -0.68   | 0.50                      | 0 / 97                    | 1 / 96                            |
| Frazee 1994    | 0.98                  | 0.10        | 9.69        | -0.01   | 0.99                      | 1 / 135                   | 1 / 133                           |
| Macarulla 1995 | 1.42                  | 0.22        | 9.20        | 0.37    | 0.71                      | 2 / 241                   | 1 / 237                           |
| Pozo 1996      | 1.81                  | 0.36        | 9.14        | 0.72    | 0.47                      | 3 / 261                   | 1 / 261                           |
| Henle 1996     | 1.19                  | 0.31        | 4.60        | 0.26    | 0.80                      | 4 / 348                   | 3 / 343                           |
| Minne 1997     | 1.30                  | 0.40        | 4.26        | 0.44    | 0.66                      | 6 / 375                   | 4 / 366                           |
| Schippers 1997 | 1.57                  | 0.52        | 4.74        | 0.79    | 0.43                      | 8 / 395                   | 4 / 386                           |
| Sezeur 1997    | 1.71                  | 0.60        | 4.87        | 1.00    | 0.32                      | 9 / 410                   | 4 / 403                           |
| Hellberg 1999  | 1.72                  | 0.73        | 4.05        | 1.25    | 0.21                      | 14 / 654                  | 7 / 659                           |
| Hall Long 2000 | 1.96                  | 0.88        | 4.35        | 1.65    | 0.10                      | 18 / 747                  | 8 / 764                           |
| Olmi 2005      | 1.62                  | 0.78        | 3.38        | 1.30    | 0.19                      | 20 / 897                  | 11 / 902                          |
| Kehagias 2009  | 1.66                  | 0.82        | 3.35        | 1.42    | 0.16                      | 22 / 943                  | 12 / 950                          |
| Wei 2010       | 1.17                  | 0.62        | 2.23        | 0.49    | 0.62                      | 24 / 1055                 | 21 / 1058                         |
| Jan 2011       | 0.96                  | 0.53        | 1.75        | -0.13   | 0.90                      | 26 / 1115                 | 28 / 1118                         |
| Kocatas 2013   | 0.96                  | 0.54        | 1.72        | -0.14   | 0.89                      | 27 / 1165                 | 29 / 1164                         |
|                | 0.96                  | 0.54        | 1.72        | -0.14   | 0.89                      |                           |                                   |

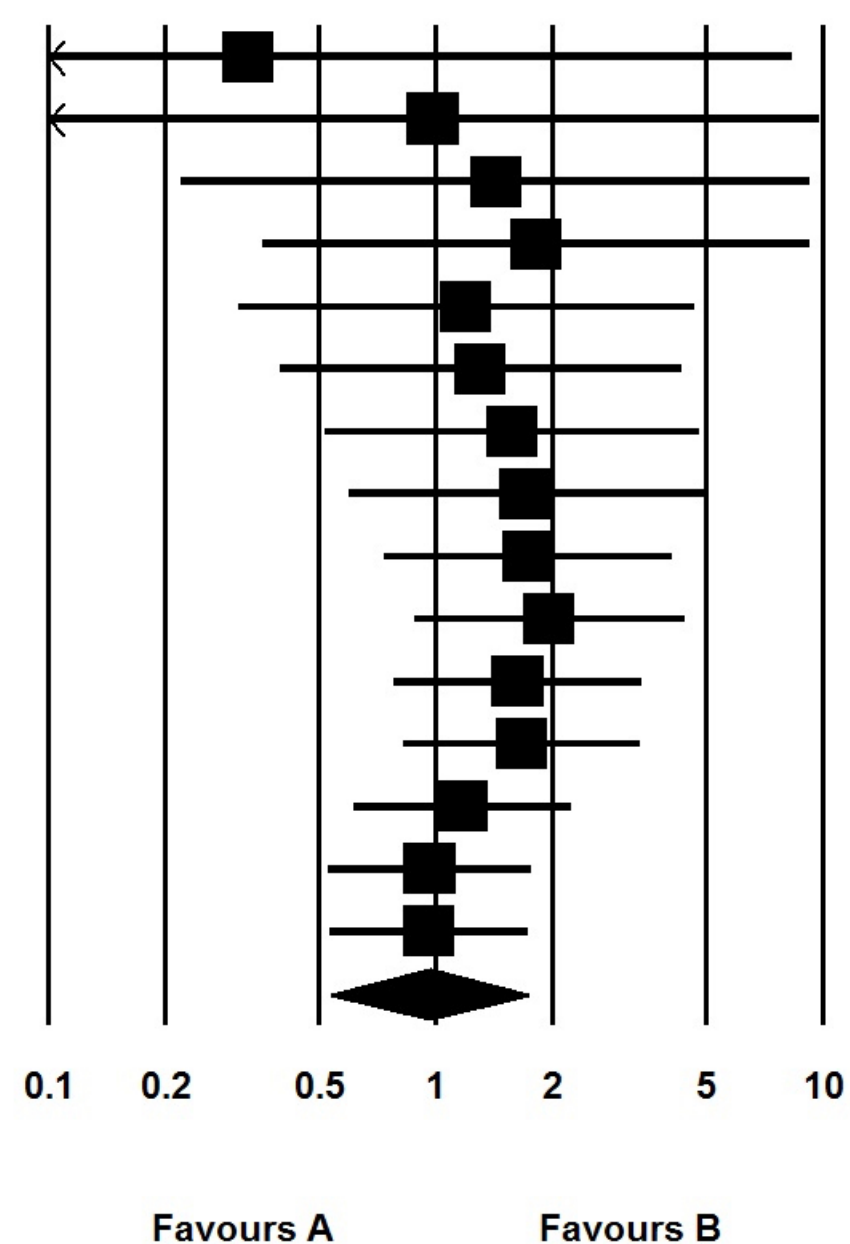

Supplement: MOESM1 [file 9738526]
