# Supplementary figures and images for: Evidence of surgical outcomes fluctuates over time: results from a cumulative meta-analysis of laparoscopic versus open appendectomy for acute appendicitis
Source: Springer Nature journal article supplement (doi:10.1186/s12876-016-0453-0), 2016-03-15

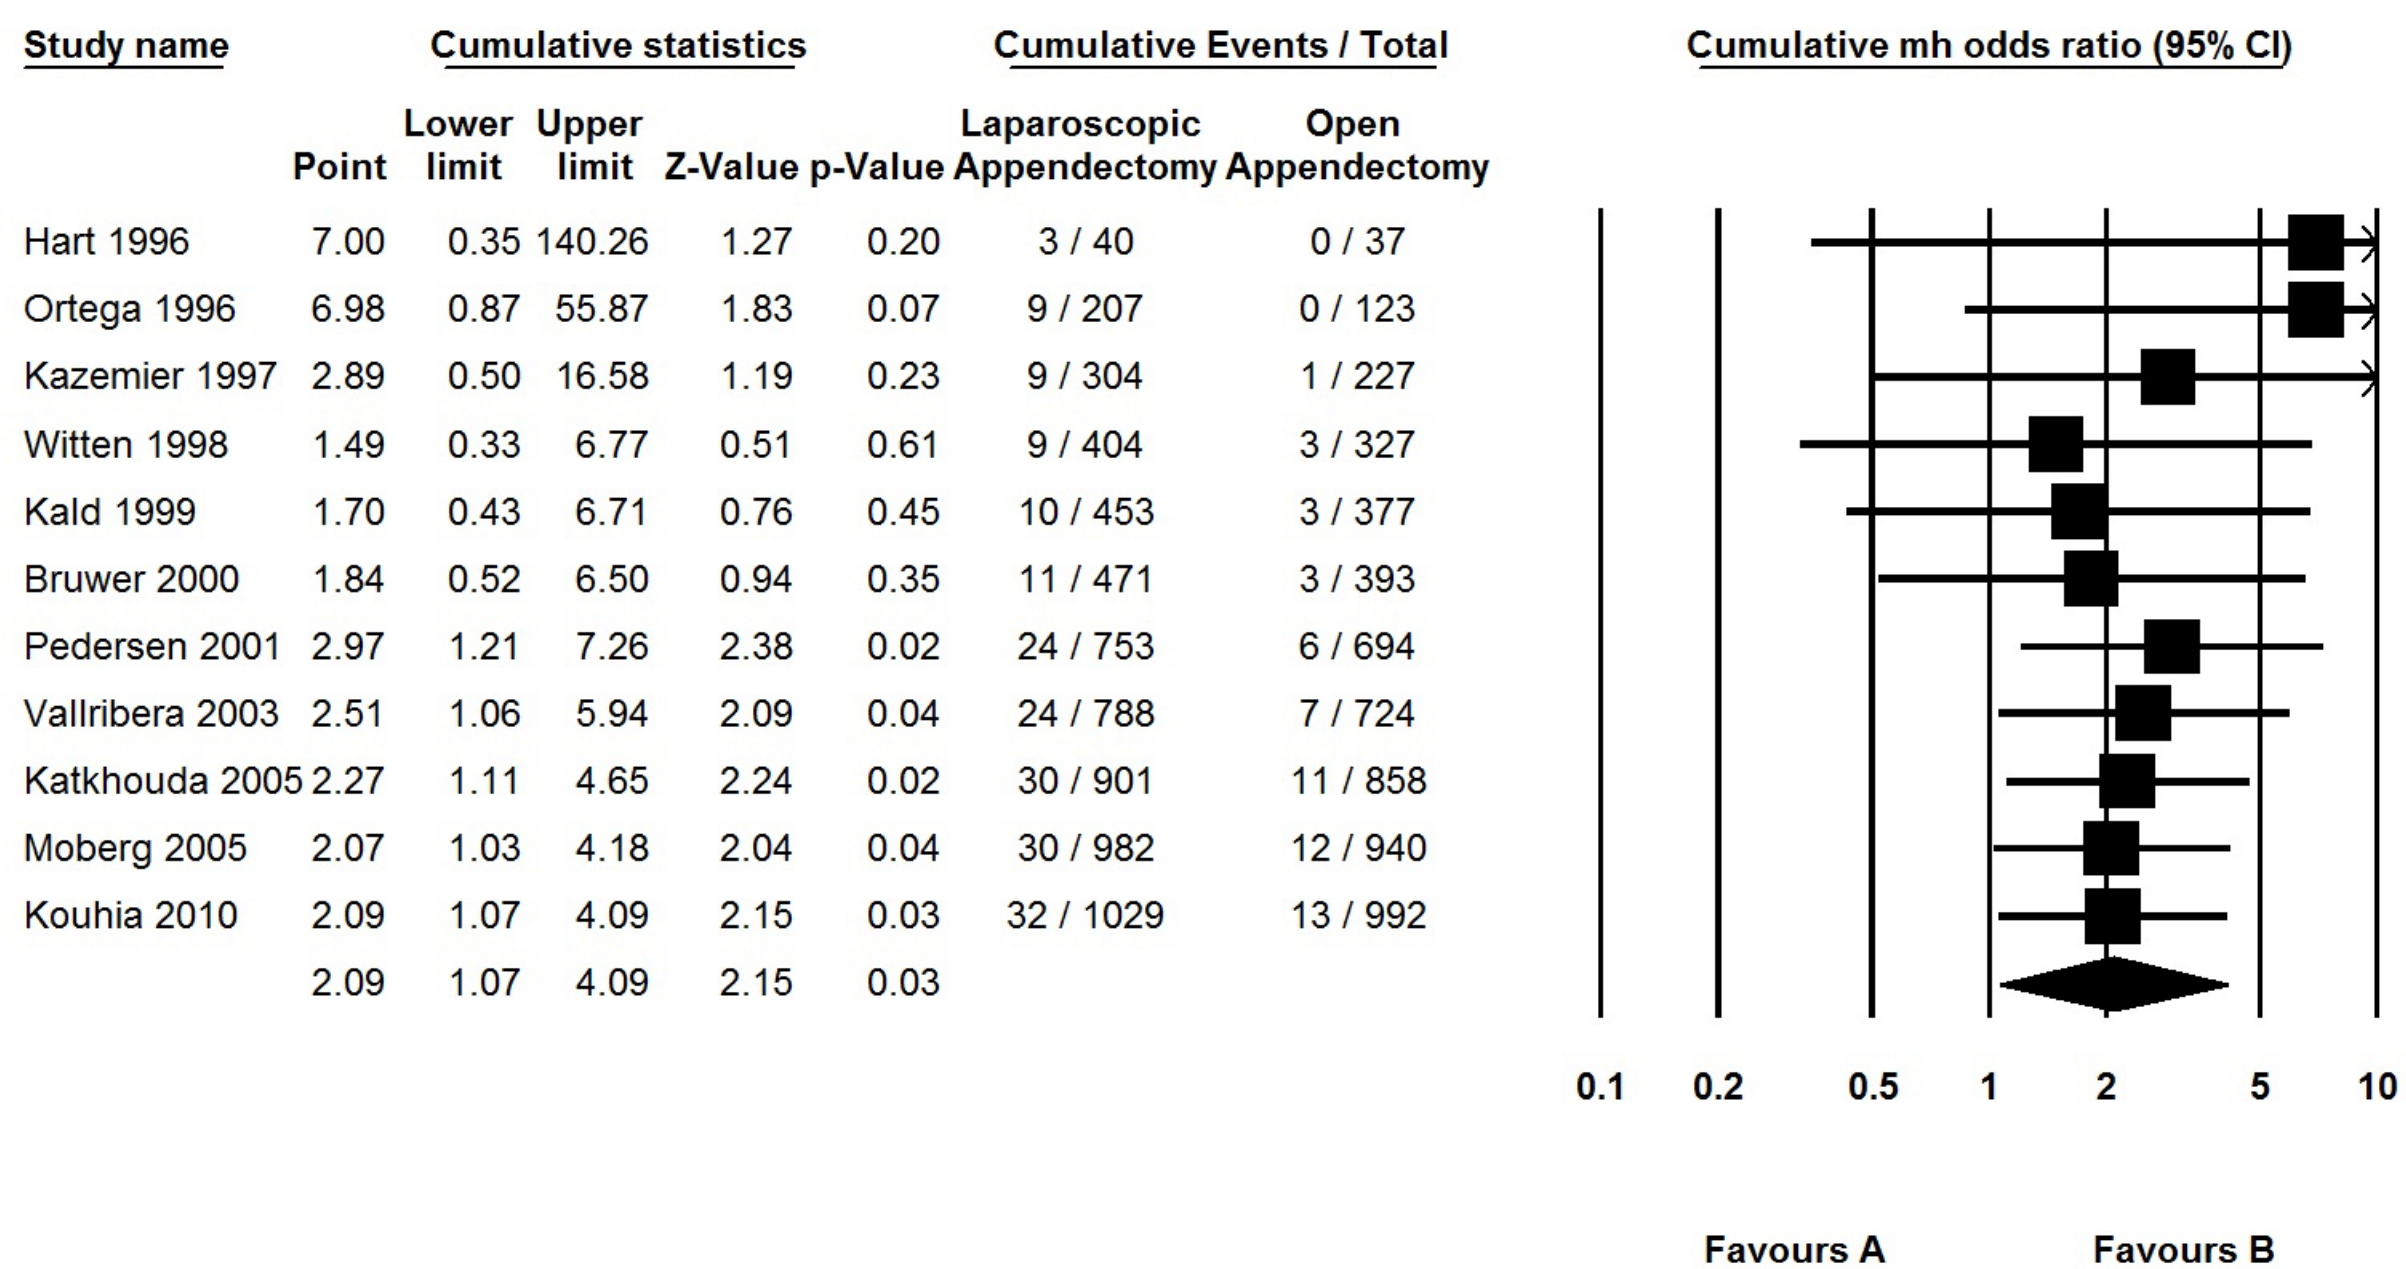

Supplement: MOESM1 [file 9738526]

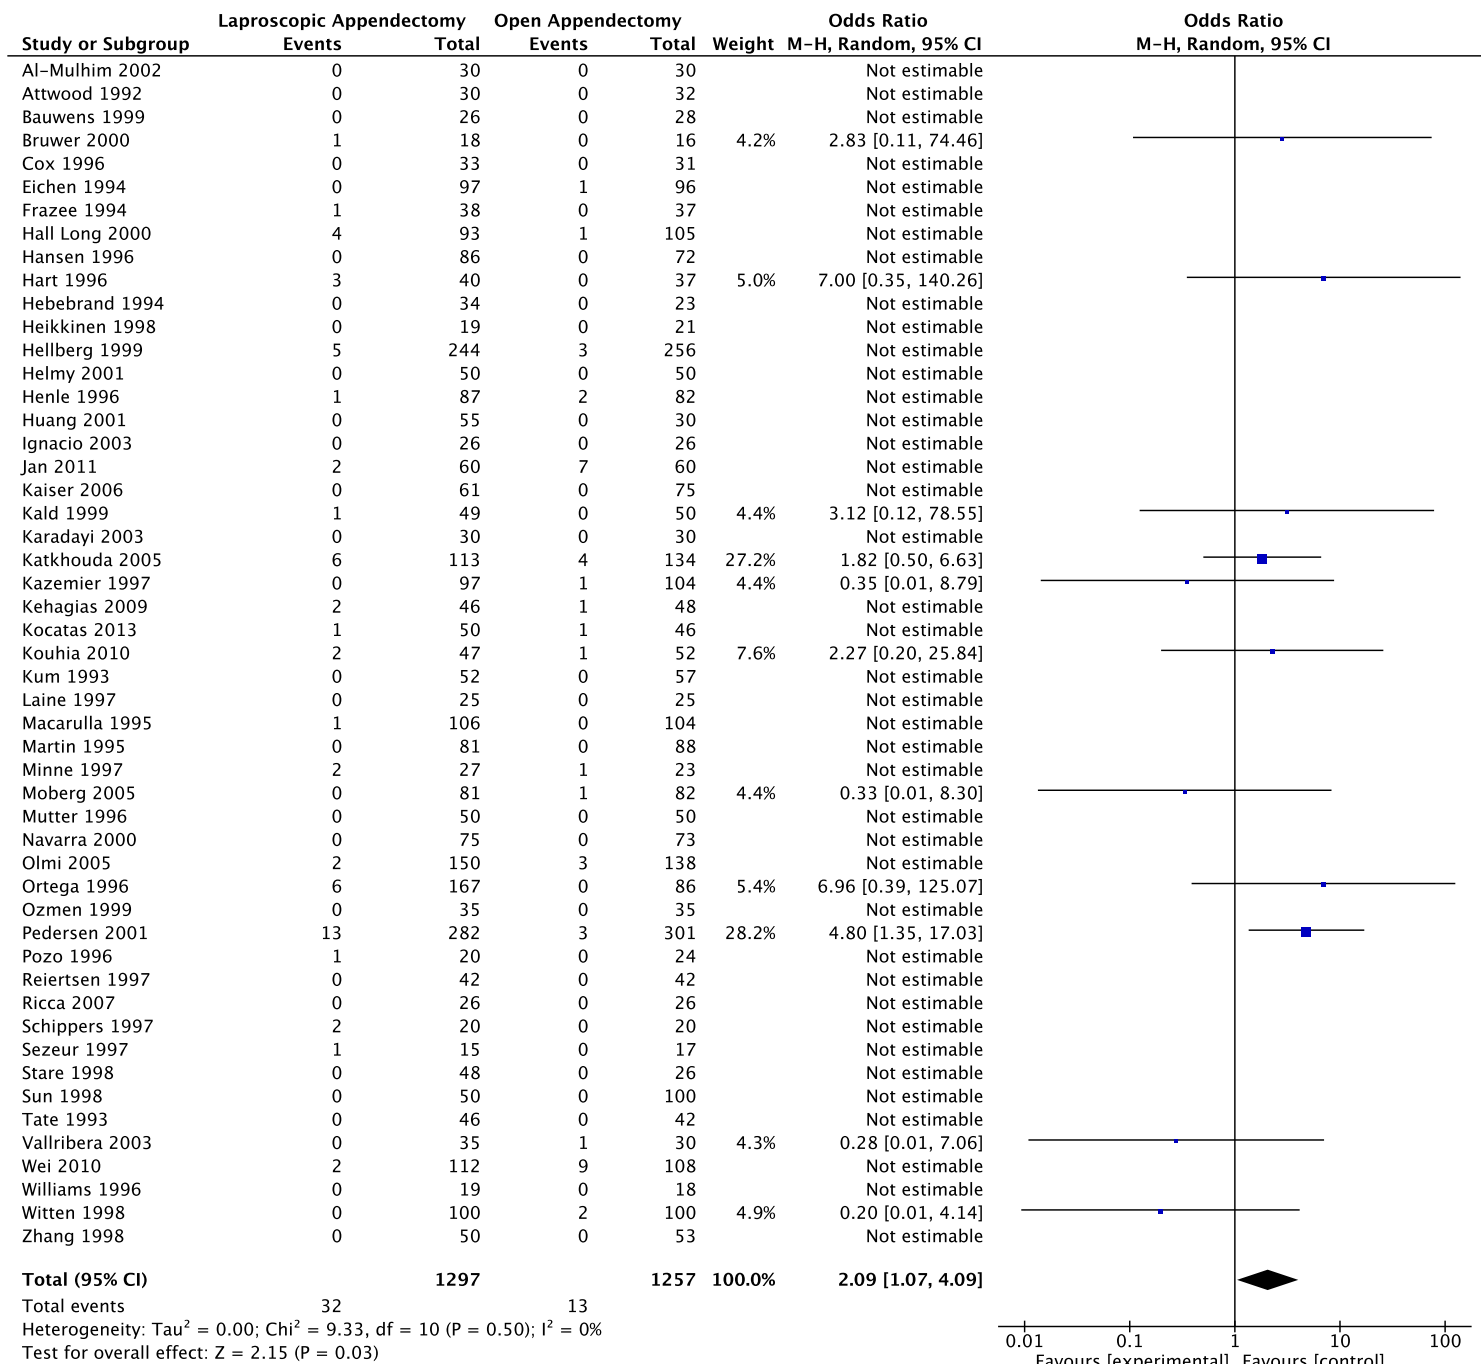

Supplement: MOESM1 [file 9738526]

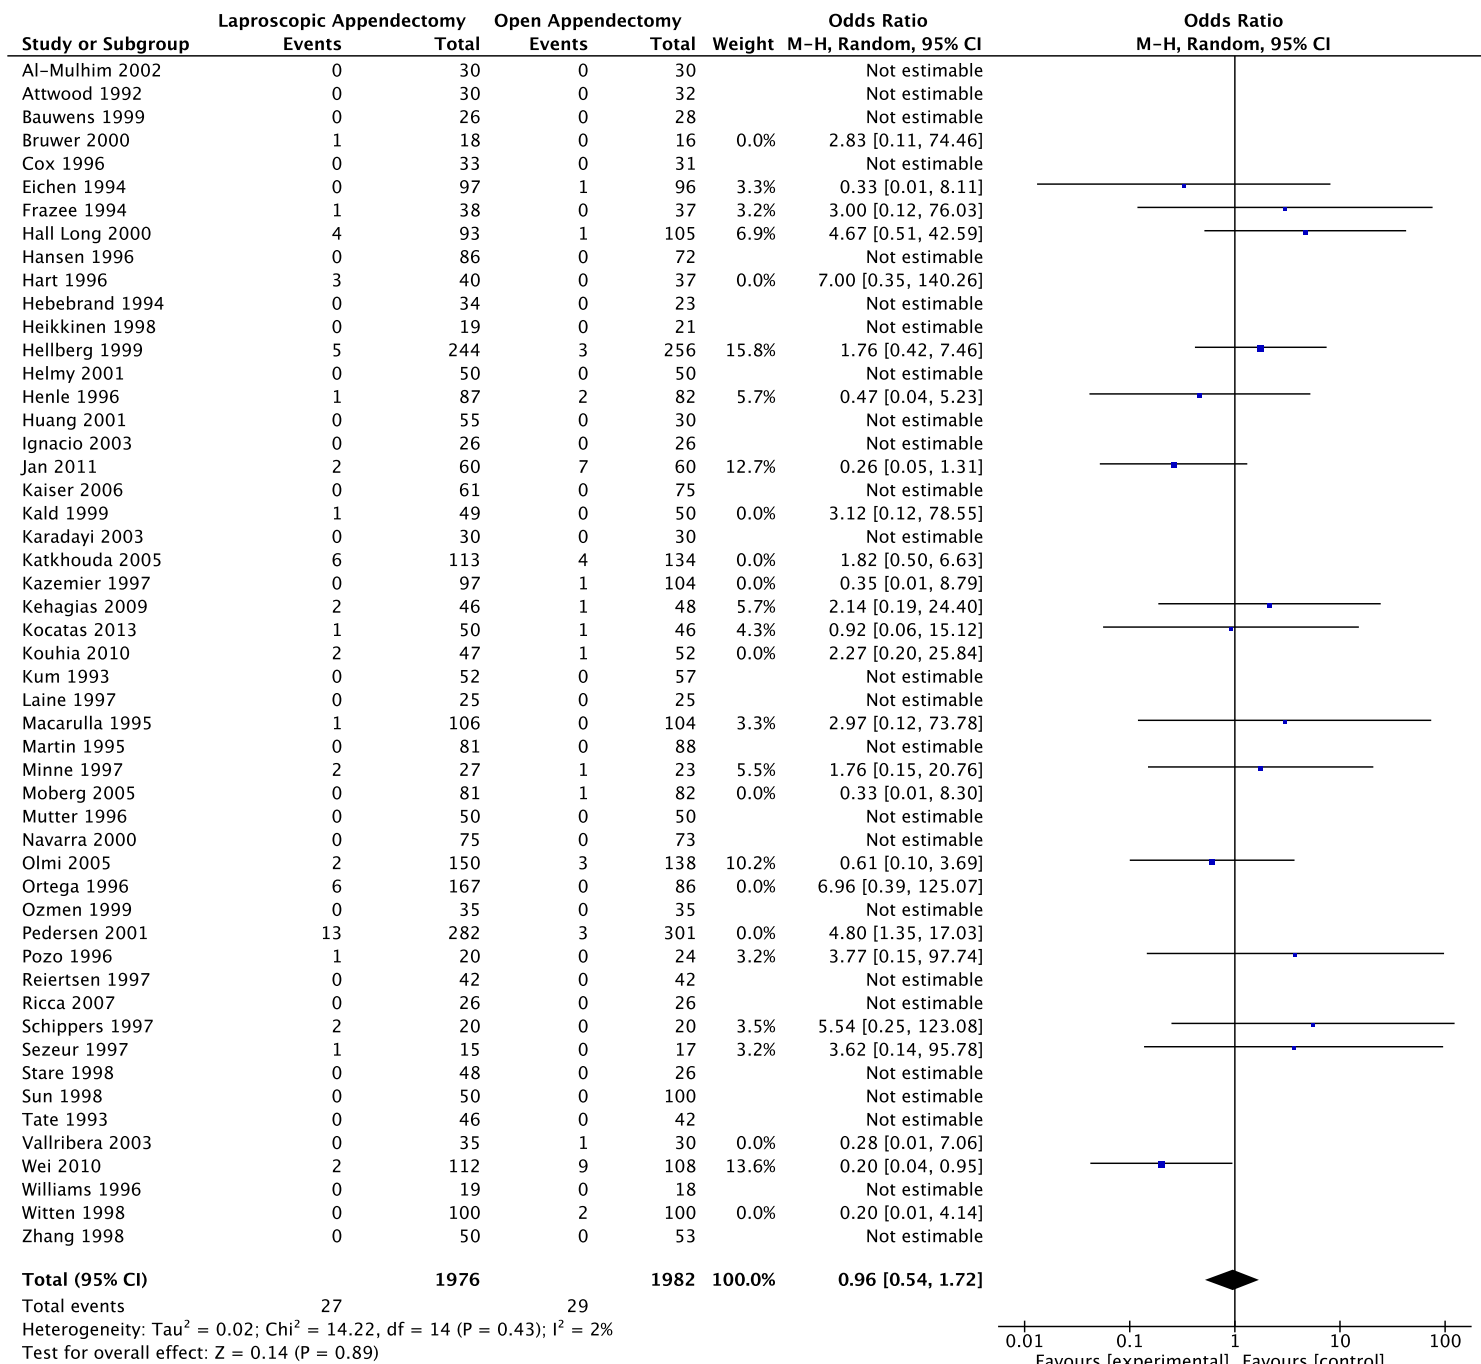

Supplement: MOESM1 [file 9738526]
